# Supplementary material for: Gastric Microbiota in Helicobacter pylori-Negative and -Positive Gastritis Among High Incidence of Gastric Cancer Area
Source: PubMed Central journal article supplement (PMC6520852; doi:10.3390/cancers11040504), 2019-04-10
Supplement: cancers-11-00504-s001.pdf [file cancers-11-00504-s001.pdf]

Supplementary Material:

# Gastric Microbiota in *Helicobacter pylori*-Negative and -Positive Gastritis Among High Incidence of Gastric Cancer Area

Boldbaatar Gantuya, Hashem B. El-Serag, Takashi Matsumoto, Nadim J. Ajami, Khasag Oyuntsetseg, Dashdorj Azzaya, Tomohisa Uchida and Yoshio Yamaoka

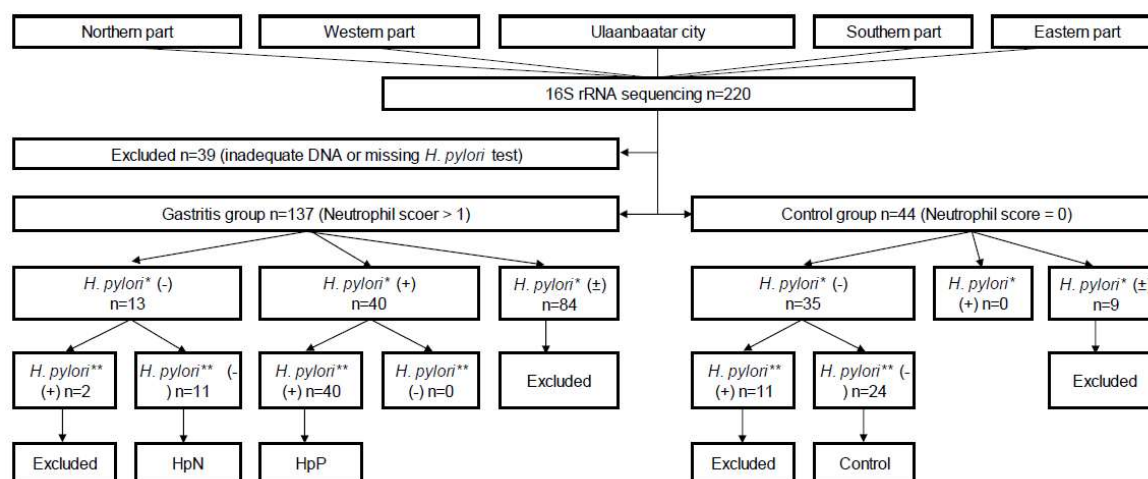

*H. pylori*\*: All test positive (culture, histology, immunohistochemistry, rapid urease test and serology)  
*H. pylori*\*\* : 16S rRNA (positive: relative abundance is higher than 2%, negative: less than 2%)

**Figure S1.** Flow chart for case selection in the three study groups. The case selection is based on neutrophil infiltration and *H. pylori* infection status. For gastritis diagnosis, any gastric site (antrum, corpus and incisura angularis) with neutrophil infiltration score  $\geq 1$  is considered gastritis. For *H. pylori* diagnosis, *H. pylori*\*: gold standard method based on culture, histology, immunohistochemistry and serological method; *H. pylori*\*\* : 16S rRNA approach based on relative abundance (RA). RA  $\geq 2\%$  of *H. pylori* considered positive and  $< 2\%$  as negative. From overall cases 39 were excluded because of suboptimal DNA quantity. Of the remaining 181 cases, 137 had gastritis based on PMN score  $\geq 1$  presence in any gastric biopsy site, and the other 44 had no gastritis with PMN score  $< 1$ . Of the 181 cases, 133 had positive testing for *H. pylori* on at least one of the five conventional tests, and 48 were negative for all five tests. Of those, we selected only cases with positive results for *all* five conventional tests ( $n = 40$ ) for further analysis as *H. pylori*-positive cases and excluded the rest ( $n = 93$ ). All groups were further evaluated for *H. pylori* status by 16S rRNA gene sequencing using a relative abundance cut off value of 2% for positive results based on previous study. All 40 *H. pylori*-positive gastritis (HpP) cases were confirmed positive by 16S rRNA gene sequencing. Of the 48 cases with negative all five conventional *H. pylori* tests, 35 had no gastritis and 13 had gastritis. Among 13 *H. pylori*-negative gastritis (HpN) patients, two were *H. pylori*-positive by 16s rRNA gene sequencing and were excluded. Similarly, 11 samples from the control group had detectable levels of *H. pylori* by 16S rRNA sequencing and were excluded.

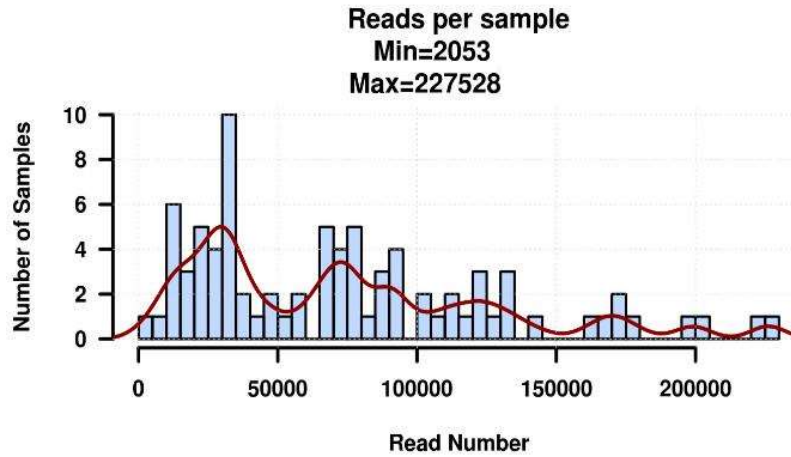

Figure S2. Overall sequence reads. Number of sequence reads per samples were shown.

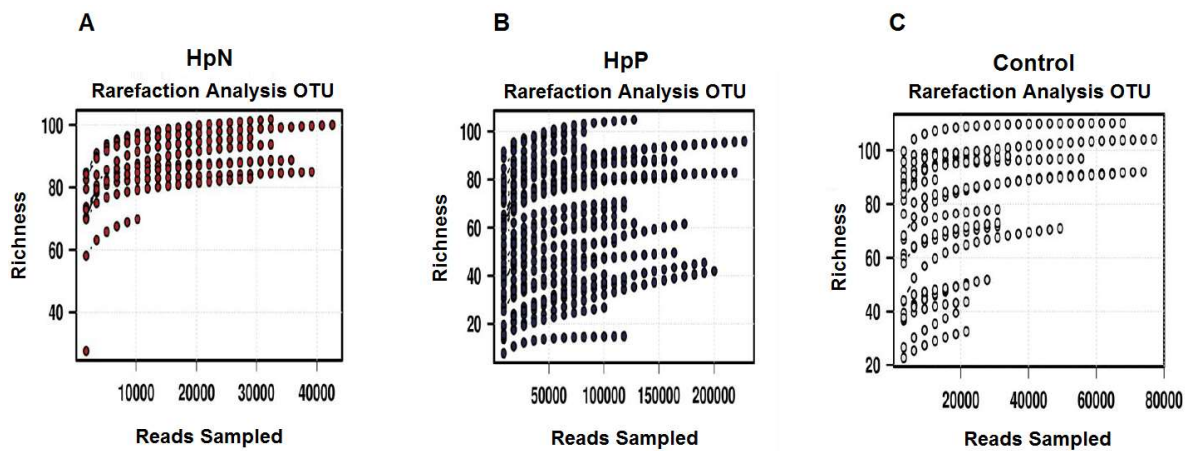

Figure S3. Rarefaction analysis. Rarefaction analysis is shown in comparison groups separately: HpN (A), HpP (B) and Control (C).

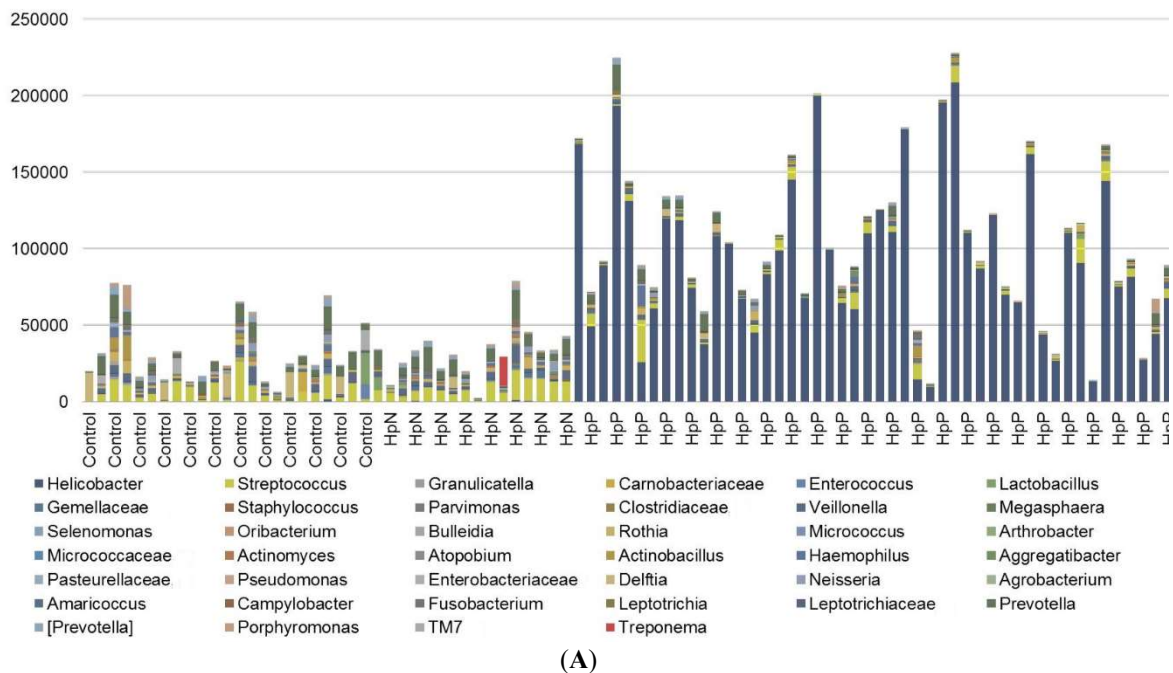

(A)

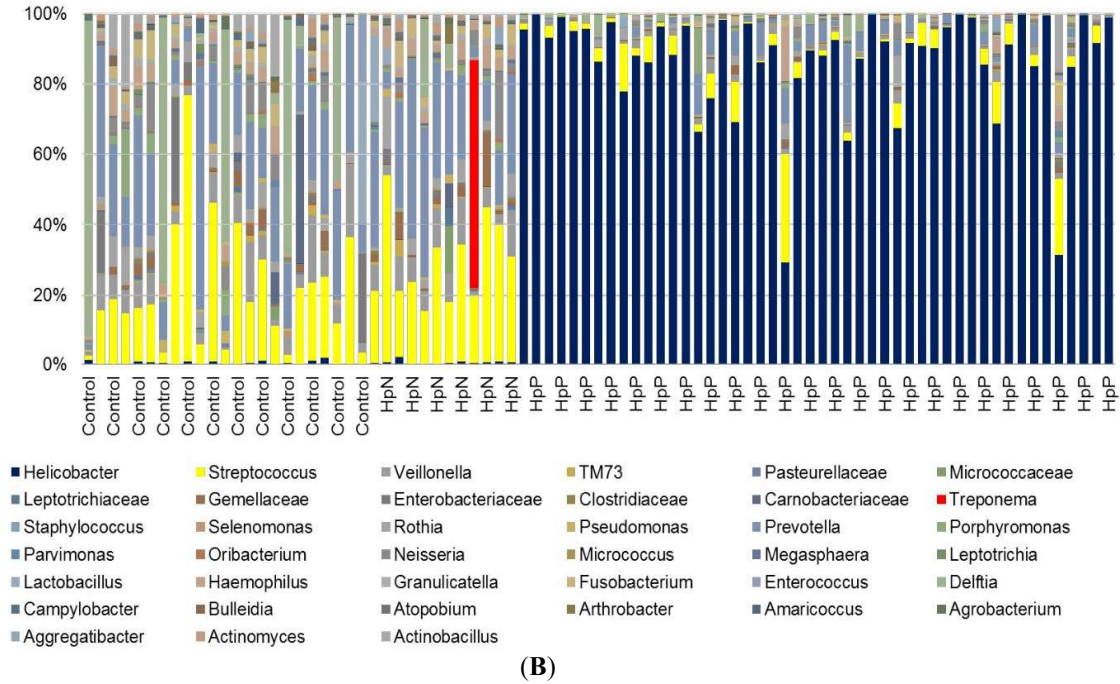

**Figure S4.** Bacterial relative abundance per sample. The overall bacterial reads based on raw read counts after filtering for low abundant OTUs (A) and their relative abundance (B) are shown in each comparison groups at genus level per sample.

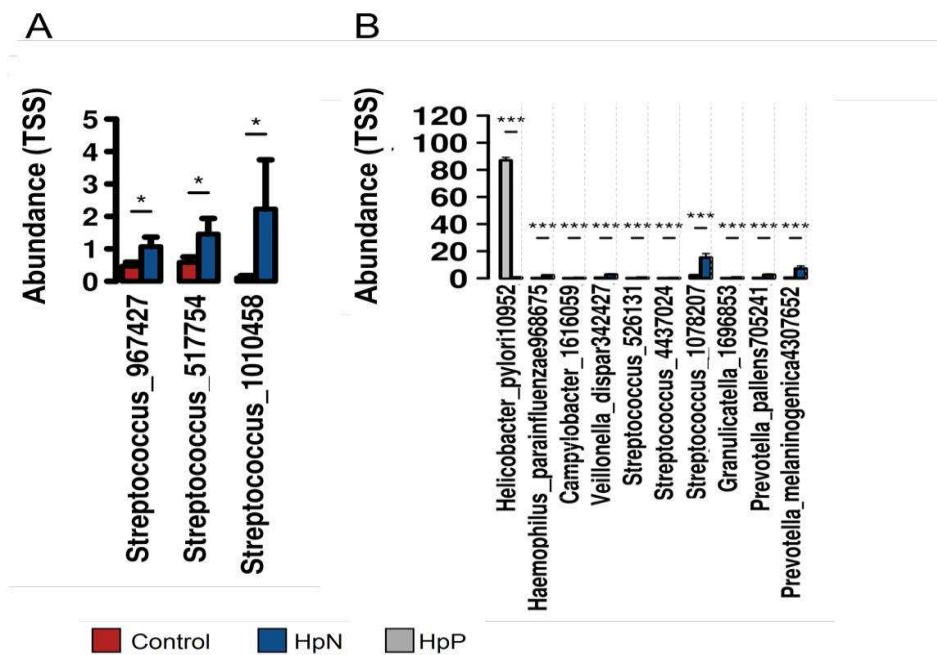

**Figure S5.** ANOVA test comparisons for bacterial abundance. Bacterial abundance differences were observed for 3 species in HpN vs control group (A), 48 species were significantly different between HpN and HpP group and the top 10 species are shown (B). TSS: Total -sum normalization. \*:  $p < 0.05$ , \*\*\*:  $p < 0.001$ .

A

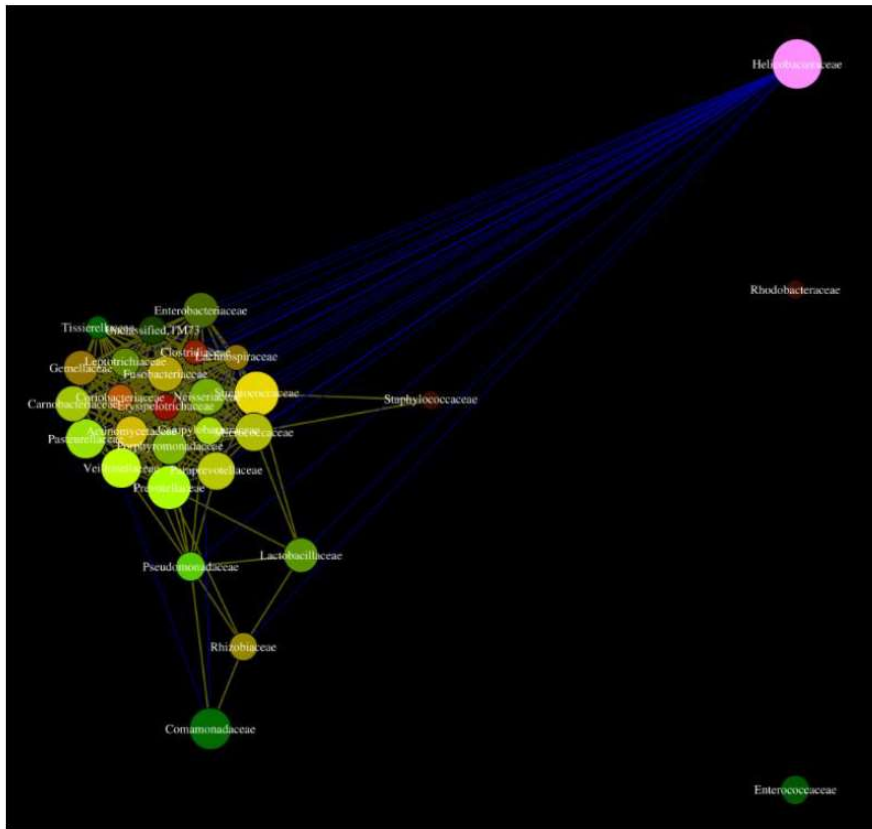

- HpN
- Control
- HpP

B

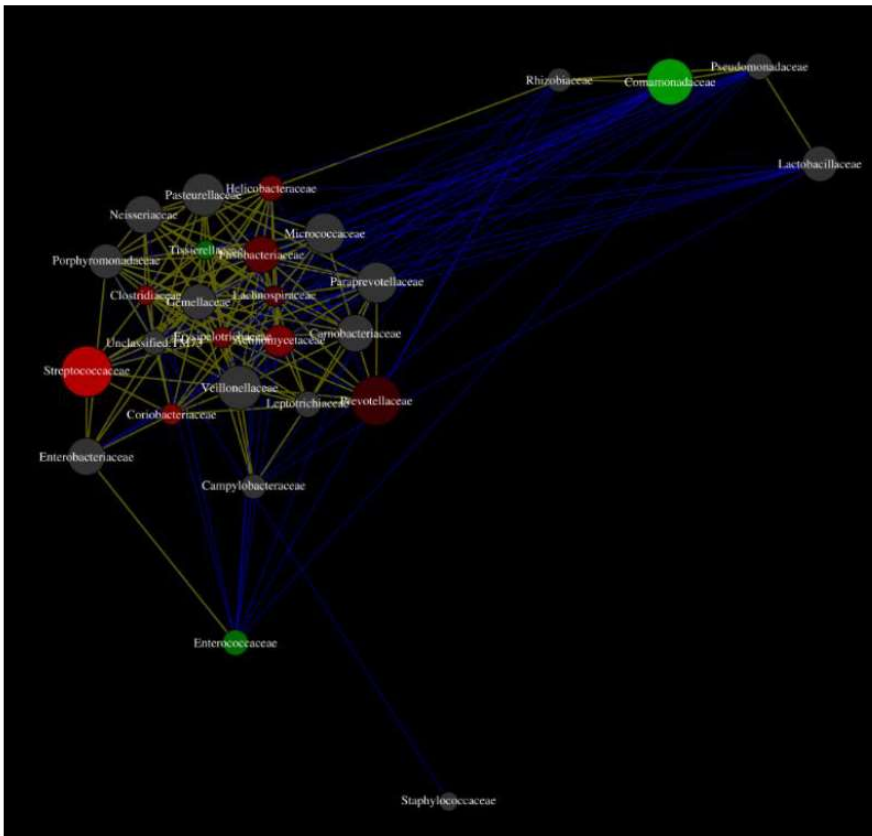

- HpN
- Control

C

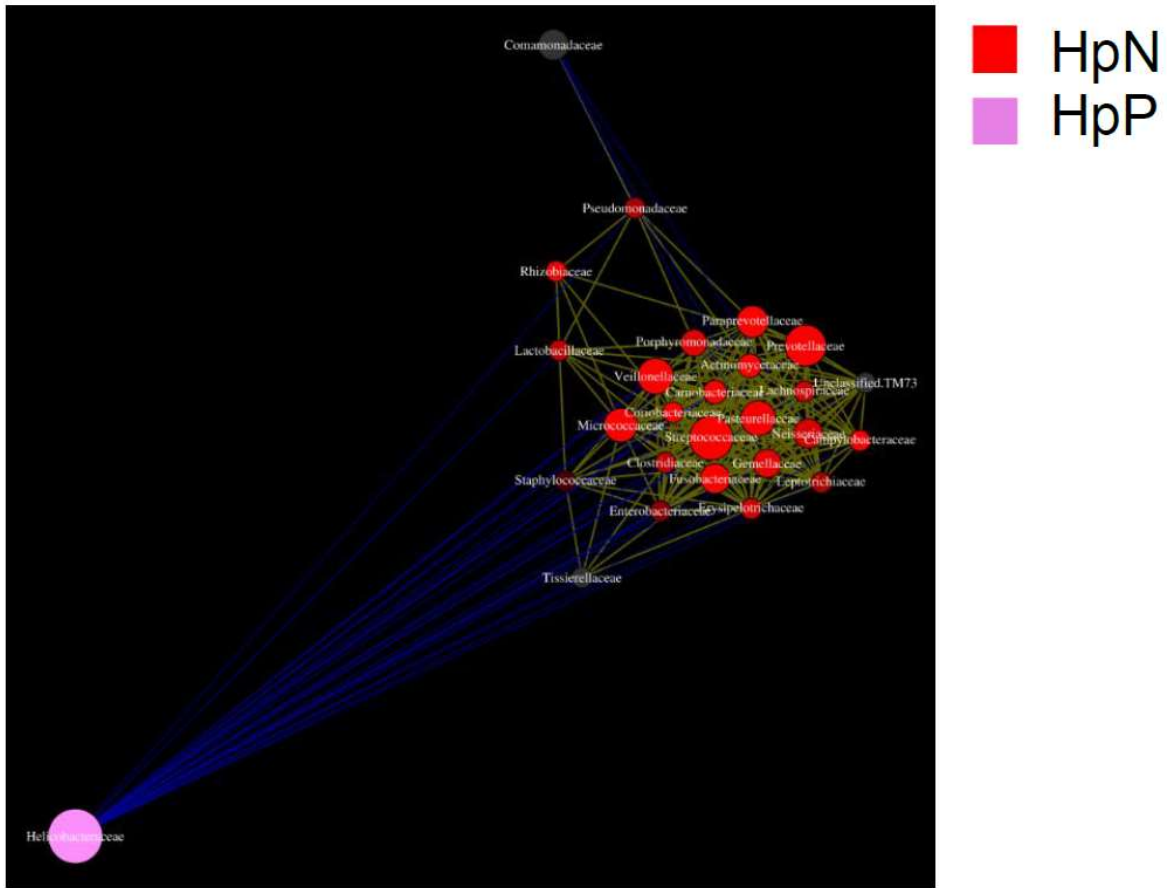

**Figure S6.** Network analysis for comparison groups A. The co-occurrence and disease specific bacterial interaction according to overall group (A), HpN vs. HpP group (B) and HpN vs. control group (C) were shown at family level. Taxa are represented as nodes, taxa abundance as node size, and edges represent positive associations (positive correlations between nodes are presented in yellow, negative correlations in blue). Nodes can be colored based on their association with selected environmental variables based on Pearson’s correlation.

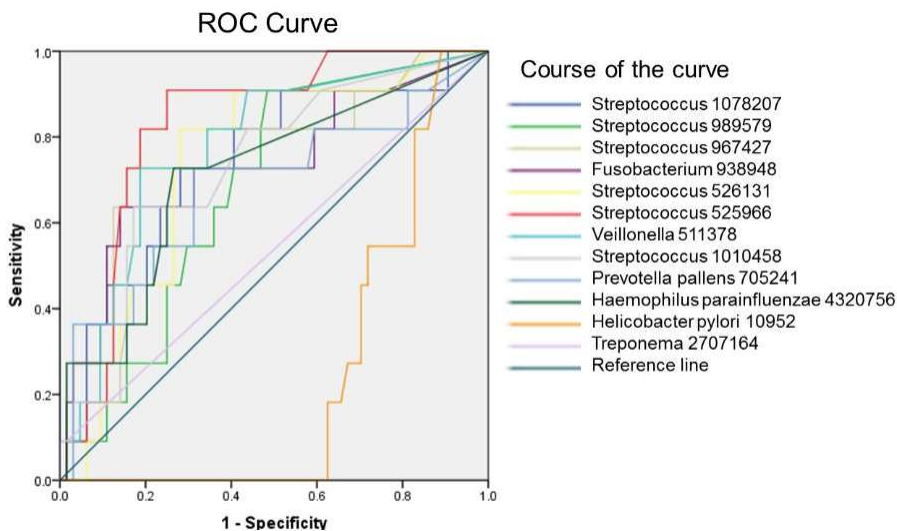

**Figure S7.** Receiver operating curve analysis for selected microbial biomarkers of *H. pylori* negative gastritis. 11 selected microbial biomarkers of *H. pylori* negative gastritis were tested by ROC analysis. In addition, *H. pylori* was included.

**Table S1.** Age and gender status according to the three study groups.

| Disease        | Mean Age $\pm$ SD | Male to Female Ratio |
|----------------|-------------------|----------------------|
| Control        | 48.5 $\pm$ 17.9   | 0.5                  |
| HpN            | 52 $\pm$ 17.1     | 0.6                  |
| HpP            | 44.4 $\pm$ 13.6   | 0.3                  |
| <i>p</i> value | 0.3 <sup>†</sup>  | 0.5 <sup>‡</sup>     |

<sup>†</sup> ANOVA, <sup>‡</sup> Chi square.

**Table S2.** Selected candidates for microbial biomarkers in *H. pylori* negative gastritis.

|                               | Genus         | Species                | <i>p</i> Value | AUC  | AUC   | AUC      | OR    | OR     | OR      |
|-------------------------------|---------------|------------------------|----------------|------|-------|----------|-------|--------|---------|
|                               |               |                        |                |      | Lower | Upper    |       | Lower  | Upper   |
|                               |               |                        |                |      | CI    | Upper CI |       |        | CI      |
| HpN vs. HpP and control group | Streptococcus | 967427                 | 0.00016        | 0.87 | 0.72  | 1        | 22.8  | 4.08   | 189.89  |
|                               | Streptococcus | 989579                 | 0.00044        | 0.83 | 0.69  | 0.98     | 21.58 | 4.34   | 139.67  |
|                               | Streptococcus | 1010458                | 0.00023        | 0.84 | 0.71  | 0.98     | 8.67  | 0.75   | 199.09  |
|                               | Streptococcus | 1078207                | 0.00002        | 0.92 | 0.84  | 1        | 50.67 | 8.65   | 472.54  |
|                               | Streptococcus | 525966                 | 0.00011        | 0.87 | 0.72  | 1        | 21.58 | 4.34   | 139.67  |
|                               | Streptococcus | 526131                 | 0.00012        | 0.88 | 0.72  | 1        | 31.5  | 6.14   | 253.12  |
|                               | Prevotella    | pallens 705241         | 0.00021        | 0.87 | 0.7   | 1        | 68.25 | 9.19   | 1466.12 |
|                               | Haemophilus   | parainfluenzae 4320756 | 0.000079       | 0.84 | 0.69  | 0.99     | 22.29 | 2.81   | 472.84  |
|                               | Fusobacterium | 938948                 | 0.0024         | 0.8  | 0.62  | 0.98     | 14.8  | 2.99   | 91.29   |
|                               | Veillonella   | 511378                 | 0.00063        | 0.83 | 0.65  | 1        | 68.25 | 9.19   | 1466.12 |
| HpN vs. HpP group             | Actinomyces   | 1089121                | 0.0042         | 0.78 | 0.57  | 1        | 46.8  | 6.35   | 988.54  |
|                               | Actinomyces   | 12574                  | 0.00077        | 0.83 | 0.68  | 0.98     | 4     | 0.82   | 19.3    |
|                               | Actinomyces   | 875735                 | 0.00017        | 0.87 | 0.72  | 1        | 46.8  | 6.35   | 988.54  |
|                               | Atopobium     | 4451251                | 0.00011        | 0.87 | 0.72  | 1        | 104   | 13.46  | 2325.44 |
|                               | Rothia        | dentocariosa 4304654   | 0.0092         | 0.75 | 0.55  | 0.95     | 14.62 | 1.64   | 317.96  |
|                               | Rothia        | mucilaginosa 1017181   | 0.003          | 0.8  | 0.62  | 0.97     | 10.8  | 2.34   | 57.66   |
|                               | Rothia        | mucilaginosa 866280    | 0.0032         | 0.79 | 0.59  | 0.99     | 14.8  | 2.99   | 91.29   |
|                               | Porphyromonas | 970138                 | 0.037          | 0.7  | 0.52  | 0.89     | 4.72  | 1.07   | 21.4    |
|                               | Prevotella    | 4304901                | 0.004          | 0.76 | 0.6   | 0.93     | 10.86 | 1.78   | 90.35   |
|                               | Prevotella    | 4321398                | 0.00021        | 0.84 | 0.68  | 1        | 46.8  | 6.35   | 988.54  |
| Prevotella                    | 4324196       | 0.0035                 | 0.79           | 0.61 | 0.97  | 15.83    | 2.77  | 130.53 |         |

|                |                        |          |      |      |      |       |      |         |
|----------------|------------------------|----------|------|------|------|-------|------|---------|
| Prevotella     | 4426163                | 0.0064   | 0.75 | 0.57 | 0.92 | 10.28 | 2.02 | 62.37   |
| Prevotella     | 4458304                | 0.0015   | 0.81 | 0.65 | 0.97 | 15.83 | 2.77 | 130.53  |
| Prevotella     | 530206                 | 0.016    | 0.74 | 0.52 | 0.95 | 14.8  | 2.99 | 91.29   |
| Prevotella     | 851822                 | 0.003    | 0.79 | 0.59 | 0.99 | 46.8  | 6.35 | 988.54  |
| Prevotella     | melaninogenica 4306852 | 0.0012   | 0.82 | 0.66 | 0.97 | 21.58 | 4.34 | 139.67  |
| Prevotella     | melaninogenica 4307391 | 0.0038   | 0.78 | 0.6  | 0.97 | 10.86 | 1.78 | 90.35   |
| Prevotella     | melaninogenica 4307652 | 0.000019 | 0.93 | 0.83 | 1    | 68.25 | 9.19 | 1466.12 |
| Prevotella     | melaninogenica 525942  | 0.0094   | 0.75 | 0.56 | 0.94 | 8.4   | 1.91 | 41.25   |
| Prevotella     | melaninogenica 535359  | 0.029    | 0.71 | 0.52 | 0.91 | 5.14  | 1.01 | 27.09   |
| Prevotella     | nanceiensis 4310398    | 0.041    | 0.7  | 0.52 | 0.88 | 1.56  | 0.2  | 8.65    |
| Prevotella     | tanneriae 2714267      | 0.012    | 0.7  | 0.52 | 0.89 | 15.83 | 2.77 | 130.53  |
| Clostridiaceae | 527630                 | 0.0076   | 0.75 | 0.56 | 0.93 | 10.28 | 2.02 | 62.37   |
| Gemellaceae    | 1074210                | 0.0026   | 0.78 | 0.58 | 0.98 | 21.58 | 4.34 | 139.67  |
| Gemellaceae    | 535353                 | 0.00077  | 0.82 | 0.64 | 1    | 32.5  | 4.32 | 683.99  |
| Gemellaceae    | 858896                 | 0.014    | 0.74 | 0.54 | 0.94 | 7.05  | 1.3  | 43.14   |
| Bulleidia      | moorei 851938          | 0.0032   | 0.79 | 0.63 | 0.95 | 14.8  | 2.99 | 91.29   |
| Granulicatella | 1696853                | 0.00007  | 0.89 | 0.74 | 1    | 32.89 | 6.35 | 236.41  |
| Megasphaera    | 4296242                | 0.0035   | 0.78 | 0.6  | 0.97 | 10.28 | 2.02 | 62.37   |
| Oribacterium   | 749837                 | 0.0038   | 0.77 | 0.57 | 0.97 | 46.8  | 6.35 | 988.54  |
| Selenomonas    | 4307790                | 0.04     | 0.7  | 0.5  | 0.89 | 2.69  | 0.58 | 11.79   |
| Streptococcus  | 1079866                | 0.0025   | 0.79 | 0.61 | 0.97 | 8.4   | 1.91 | 41.25   |
| Streptococcus  | 1082539                | 0.0066   | 0.76 | 0.56 | 0.95 | 15.83 | 2.77 | 130.53  |
| Streptococcus  | 2024840                | 0.00029  | 0.86 | 0.69 | 1    | 40.5  | 7.55 | 342.18  |
| Streptococcus  | 3449122                | 0.0025   | 0.78 | 0.59 | 0.96 | 10.86 | 1.78 | 90.35   |
| Streptococcus  | 4307484                | 0.00014  | 0.87 | 0.78 | 0.97 | 2.74  | 0.33 | 19.08   |
| Streptococcus  | 4437024                | 0.00013  | 0.87 | 0.73 | 1    | 33.25 | 5.92 | 286.68  |
| Streptococcus  | 509773                 | 0.0014   | 0.81 | 0.66 | 0.97 | 12.25 | 2.77 | 64.1    |
| Streptococcus  | 516966                 | 0.011    | 0.75 | 0.6  | 0.9  | 8.67  | 0.75 | 199.09  |
| Streptococcus  | 517754                 | 0.0026   | 0.8  | 0.6  | 1    | 10.28 | 2.02 | 62.37   |
| Streptococcus  | 521996                 | 0.00018  | 0.87 | 0.71 | 1    | 50.67 | 8.65 | 472.54  |
| Streptococcus  | 538185                 | 0.00013  | 0.88 | 0.72 | 1    | 21.58 | 4.34 | 139.67  |
| Veillonella    | 1023075                | 0.0065   | 0.75 | 0.59 | 0.92 | 4.62  | 0.74 | 29.41   |
| Veillonella    | dispar 342427          | 0.00022  | 0.87 | 0.73 | 1    | 68.25 | 9.19 | 1466.12 |
| Veillonella    | dispar 4310208         | 0.017    | 0.74 | 0.54 | 0.93 | 10.8  | 2.34 | 57.66   |
| Veillonella    | dispar 4401373         | 0.00028  | 0.86 | 0.7  | 1    | 22.8  | 4.08 | 189.89  |
| Veillonella    | dispar 4408758         | 0.00024  | 0.86 | 0.74 | 0.99 | 7.13  | 1.03 | 61.36   |

|                 |                 |                         |           |      |      |      |       |       |         |
|-----------------|-----------------|-------------------------|-----------|------|------|------|-------|-------|---------|
|                 | Veillonella     | dispar 962249           | 0.0017    | 0.81 | 0.65 | 0.96 | 5.83  | 1.29  | 27.96   |
|                 | Fusobacterium   | 4313722                 | 0.0017    | 0.8  | 0.68 | 0.93 | 4.63  | 0.74  | 29.41   |
|                 | Pasteurellaceae | 3825935                 | 0.00022   | 0.85 | 0.71 | 0.99 | 10.86 | 1.78  | 90.35   |
|                 | Actinobacillus  | parahaemolyticus 971906 | 0.0049    | 0.76 | 0.57 | 0.94 | 7.05  | 1.3   | 43.14   |
|                 | Aggregatibacter | 4335776                 | 0.016     | 0.72 | 0.52 | 0.92 | 22.29 | 2.81  | 472.84  |
|                 | Aggregatibacter | segnis 92230            | 0.0072    | 0.74 | 0.56 | 0.93 | 15.83 | 2.77  | 130.53  |
|                 | Agrobacterium   | 521073                  | 0.00055   | 0.84 | 0.7  | 0.98 | 32.5  | 4.32  | 683.99  |
|                 | Campylobacter   | 1616059                 | 0.000014  | 0.92 | 0.78 | 1    | 104   | 13.46 | 2325.44 |
|                 | Haemophilus     | 517548                  | 0.00022   | 0.86 | 0.71 | 1    | 4.62  | 0.74  | 29.41   |
|                 | Haemophilus     | 995893                  | 0.0045    | 0.75 | 0.55 | 0.94 | 14.62 | 1.64  | 317.96  |
|                 | Haemophilus     | influenzae 240754       | 0.0000071 | 0.82 | 0.68 | 0.97 | 22.8  | 4.08  | 189.89  |
|                 | Haemophilus     | parainfluenzae 1671681  | 0.011     | 0.73 | 0.53 | 0.94 | 68.25 | 9.19  | 1466.12 |
|                 | Haemophilus     | Parainfluenzae 968675   | 0.000028  | 0.92 | 0.75 | 1    | 104   | 13.46 | 2325.44 |
|                 | Helicobacter    | pylori10951             | 0.0000005 | 1    | 1    | 1    | 0.01  | 0     | 0.04    |
|                 | Neisseria       | 355750                  | 0.017     | 0.72 | 0.54 | 0.9  | 7.05  | 1.3   | 43.14   |
| HpN vs. control | Streptococcus   | 1010458                 | 0.012     | 0.76 | 0.59 | 0.94 | 5.11  | 0.44  | 118.36  |
|                 | Streptococcus   | 1078207                 | 0.045     | 0.72 | 0.52 | 0.91 | 4.56  | 1     | 22.97   |
|                 | Streptococcus   | 526131                  | 0.048     | 0.71 | 0.52 | 0.9  | 4.56  | 1     | 22.97   |
|                 | Streptococcus   | 967427                  | 0.05      | 0.71 | 0.51 | 0.91 | 3.6   | 0.81  | 17.24   |
|                 | Streptococcus   | 989579                  | 0.057     | 0.7  | 0.52 | 0.88 | 3.6   | 0.81  | 17.24   |
|                 | Streptococcus   | 525966                  | 0.078     | 0.69 | 0.49 | 0.88 | 2.02  | 0.45  | 9.12    |
|                 | Haemophilus     | Parainfluenzae 4320756  | 0.0093    | 0.76 | 0.59 | 0.93 | 4     | 0.72  | 24.96   |
|                 | Fusobacterium   | 938948                  | 0.082     | 0.7  | 0.49 | 0.88 | 3.6   | 0.81  | 17.24   |
|                 | Veillonella     | 511378                  | 0.075     | 0.7  | 0.5  | 0.88 | 2.91  | 0.67  | 13.49   |
|                 | Prevotella      | Pallens 705241          | 0.084     | 0.7  | 0.48 | 0.89 | 3.6   | 0.81  | 17.24   |

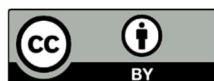

© 2019 by the authors. Licensee MDPI, Basel, Switzerland. This article is an open access article distributed under the terms and conditions of the Creative Commons Attribution (CC BY) license (<http://creativecommons.org/licenses/by/4.0/>).
